# Supplementary material for: Prunus lusitanica L. Fruits as a Novel Source of Bioactive Compounds with Antioxidant Potential: Exploring the Unknown
Source: MDPI journal article supplement (doi:10.3390/antiox11091738), 2022-08-31
Supplement: s1 [file s1]

***PRUNUS LUSITANICA* L. FRUITS AS A NOVEL SOURCE OF BIOACTIVE COMPOUNDS WITH ANTIOXIDANT POTENTIAL: EXPLORING THE UNKNOWN**

Table S1. Fruits water content (expressed in %)

| Location | Year of Study |      |      |      |
|----------|---------------|------|------|------|
|          | 2016          | 2017 | 2018 | 2019 |
| BLOC     | 62.5          | 55.9 | 60.1 | 68.9 |
| BIB      | 63.3          | 55.7 | 62.1 | 66.5 |
| P2       | 70.0          | 56.2 | 63.0 | 69.7 |

**Table S2.** Correlation matrix – Pearson’s correlation factor values (*r*)

|      | 1      | 2           | 3        | 4         | 5           | 7       | 10       | 11         | 12         | 13         | 14      | 15        | 16        | 17     | 18        | 19       | 22      | 23       | 24        | 25       | 26      | 6         | 8      | 9         | 20      | 21     | 27        | 28        | ABTS     | DPPH  | FRAP  |
|------|--------|-------------|----------|-----------|-------------|---------|----------|------------|------------|------------|---------|-----------|-----------|--------|-----------|----------|---------|----------|-----------|----------|---------|-----------|--------|-----------|---------|--------|-----------|-----------|----------|-------|-------|
| 1    | 1,000  |             |          |           |             |         |          |            |            |            |         |           |           |        |           |          |         |          |           |          |         |           |        |           |         |        |           |           |          |       |       |
| 2    | 0,212  | 1,000       |          |           |             |         |          |            |            |            |         |           |           |        |           |          |         |          |           |          |         |           |        |           |         |        |           |           |          |       |       |
| 3    | 0,260  | 0.583*      | 1,000    |           |             |         |          |            |            |            |         |           |           |        |           |          |         |          |           |          |         |           |        |           |         |        |           |           |          |       |       |
| 4    | -0,056 | 0.763**     | 0.591*   | 1,000     |             |         |          |            |            |            |         |           |           |        |           |          |         |          |           |          |         |           |        |           |         |        |           |           |          |       |       |
| 5    | 0,377  | 0.902***    | 0.612*   | 0.675*    | 1,000       |         |          |            |            |            |         |           |           |        |           |          |         |          |           |          |         |           |        |           |         |        |           |           |          |       |       |
| 7    | 0,189  | 0,504       | 0.659*   | 0.603*    | 0.621*      | 1,000   |          |            |            |            |         |           |           |        |           |          |         |          |           |          |         |           |        |           |         |        |           |           |          |       |       |
| 10   | 0,343  | -0,196      | 0.565    | -0,210    | -0,065      | 0,306   | 1,000    |            |            |            |         |           |           |        |           |          |         |          |           |          |         |           |        |           |         |        |           |           |          |       |       |
| 11   | 0,230  | 0.894***    | 0.626*   | 0.799**   | 0.905***    | 0.786** | -0,037   | 1,000      |            |            |         |           |           |        |           |          |         |          |           |          |         |           |        |           |         |        |           |           |          |       |       |
| 12   | 0,210  | 0.925***    | 0.748**  | 0.772**   | 0.8120**    | 0,547   | -0,003   | 0.814**    | 1,000      |            |         |           |           |        |           |          |         |          |           |          |         |           |        |           |         |        |           |           |          |       |       |
| 13   | 0,533  | 0.798**     | 0.813**  | 0.590*    | 0.908***    | 0.647*  | 0,272    | 0.813**    | 0.849**    | 1,000      |         |           |           |        |           |          |         |          |           |          |         |           |        |           |         |        |           |           |          |       |       |
| 14   | 0,192  | 0.568       | 0.690*   | 0.757**   | 0,541       | 0.725** | 0,314    | 0.733**    | 0.657*     | 0.619*     | 1,000   |           |           |        |           |          |         |          |           |          |         |           |        |           |         |        |           |           |          |       |       |
| 15   | 0,404  | 0,544       | 0.763**  | 0,460     | 0.784**     | 0.662*  | 0,470    | 0.685*     | 0,564      | 0.848**    | 0.6230* | 1,000     |           |        |           |          |         |          |           |          |         |           |        |           |         |        |           |           |          |       |       |
| 16   | -0,046 | 0.691*      | 0,449    | 0.840**   | 0,549       | 0.735** | -0,164   | 0.814**    | 0.625*     | 0,436      | 0.709*  | 0,286     | 1,000     |        |           |          |         |          |           |          |         |           |        |           |         |        |           |           |          |       |       |
| 17   | 0,422  | 0,419       | 0,494    | 0,118     | 0,325       | 0,218   | 0,401    | 0,330      | 0.577*     | 0,513      | 0,433   | 0,317     | 0,080     | 1,000  |           |          |         |          |           |          |         |           |        |           |         |        |           |           |          |       |       |
| 18   | 0,090  | 0.703*      | 0,351    | 0.780**   | 0.725**     | 0,533   | -0,419   | 0.720**    | 0.708*     | 0.619*     | 0,515   | 0,391     | 0.613*    | 0,055  | 1,000     |          |         |          |           |          |         |           |        |           |         |        |           |           |          |       |       |
| 19   | 0,450  | 0,231       | 0.757**  | 0,191     | 0,211       | 0,557   | 0.811**  | 0,356      | 0,409      | 0,524      | 0.603*  | 0,462     | 0,325     | 0.586* | -0,048    | 1,000    |         |          |           |          |         |           |        |           |         |        |           |           |          |       |       |
| 22   | 0,191  | 0,476       | 0.898*** | 0,467     | 0,466       | 0.629*  | 0.591*   | 0,495      | 0.609*     | 0.626*     | 0,569   | 0.636*    | 0,450     | 0,407  | 0,127     | 0.737**  | 1,000   |          |           |          |         |           |        |           |         |        |           |           |          |       |       |
| 23   | 0,265  | -0,071      | 0.682*   | 0,098     | 0,097       | 0.578*  | 0.913*** | 0,195      | 0,096      | 0,373      | 0,522   | 0.607*    | 0,137     | 0,220  | -0,167    | 0.809**  | 0.686*  | 1,000    |           |          |         |           |        |           |         |        |           |           |          |       |       |
| 24   | 0,430  | 0.671*      | 0.961*** | 0.626*    | 0.724**     | 0.690*  | 0,531    | 0.730**    | 0.785**    | 0.891***   | 0.784** | 0.845*    | 0,497     | 0,555  | 0,410     | 0.753**  | 0.847** | 0.650*   | 1,000     |          |         |           |        |           |         |        |           |           |          |       |       |
| 25   | 0,114  | -0,077      | 0.567    | 0,020     | -0,064      | 0,384   | 0.888*** | 0,091      | 0,095      | 0,206      | 0,477   | 0,395     | 0,112     | 0,384  | -0,390    | 0.800**  | 0.659*  | 0.872*** | 0,537     | 1,000    |         |           |        |           |         |        |           |           |          |       |       |
| 26   | 0,250  | -0,072      | 0.668*   | 0,035     | -0,019      | 0,478   | 0.894*** | 0,101      | 0,102      | 0,283      | 0,403   | 0,406     | 0,164     | 0,238  | -0,278    | 0.879*** | 0.756** | 0.929*** | 0.597*    | 0.872*** | 1,000   |           |        |           |         |        |           |           |          |       |       |
| 6    | 0,072  | 0.695*      | 0,279    | 0,495     | 0.788**     | 0.642*  | -0,278   | 0.803**    | 0.592*     | 0.631*     | 0,317   | 0,473     | 0,546     | 0,113  | 0.739**   | -0,005   | 0,118   | -0,094   | 0,341     | -0,249   | -0,221  | 1,000     |        |           |         |        |           |           |          |       |       |
| 8    | 0,145  | 0,449       | -0,139   | 0,107     | 0,414       | 0,151   | -0,396   | 0,400      | 0,406      | 0,321      | 0,064   | 0,012     | 0,175     | 0,343  | 0,507     | -0,147   | -0,306  | -0,449   | -0,036    | -0,380   | -0,512  | 0.705*    | 1,000  |           |         |        |           |           |          |       |       |
| 9    | 0.607* | 0.796**     | 0.691*   | 0.632*    | 0.802**     | 0.609*  | 0,111    | 0.799**    | 0.814**    | 0.855***   | 0.597*  | 0,59*     | 0.576*    | 0.607* | 0,570     | 0,522    | 0,562   | 0,218    | 0.789**   | 0,112    | 0,212   | 0,524     | 0,293  | 1,000     |         |        |           |           |          |       |       |
| 20   | 0,567  | 0.656*      | 0.623*   | 0,559     | 0.729**     | 0,440   | 0,257    | 0.660*     | 0.662*     | 0.762**    | 0.730** | 0.770**   | 0,356     | 0.586* | 0,396     | 0,417    | 0,520   | 0,323    | 0.794**   | 0,272    | 0,186   | 0,254     | 0,084  | 0.756**   | 1,000   |        |           |           |          |       |       |
| 21   | 0,199  | 0,559       | 0,488    | 0,426     | 0.724**     | 0,250   | -0,028   | 0,506      | 0.590*     | 0.690*     | 0,276   | 0.677*    | 0,031     | 0,397  | 0,493     | -0,037   | 0,264   | 0,020    | 0,529     | -0,118   | -0,183  | 0,484     | 0,251  | 0,559     | 0.638*  | 1,000  |           |           |          |       |       |
| 27   | -0,168 | (-0.883)*** | -0,566   | (-0.690)* | (-0.878)*** | -0,501  | 0,155    | (-0.804)** | (-0.768)** | (-0.754)** | -0,461  | (-0.624)* | (-0.617)* | -0,072 | (-0.681)* | -0,154   | -0,501  | -0,022   | (-0.629)* | 0,118    | -0,015  | (-0.654)* | -0,233 | (-0.604)* | -0,534  | -0,456 | 1,000     |           |          |       |       |
| 28   | -0,120 | (-0.871)*** | -0,545   | (-0.689)* | (-0.845)**  | -0,485  | 0,185    | (-0.764)** | (-0.783)** | (-0.724)** | -0,451  | (-0.579)* | (-0.607)* | -0,075 | (-0.704)* | -0,123   | -0,505  | 0,017    | (-0.598)* | 0,137    | 0,011   | (-0.634)* | -0,256 | -0,564    | -0,504  | -0,432 | 0.988***  | 1,000     |          |       |       |
| ABTS | 0,276  | 0,451       | 0,560    | 0,355     | 0.625*      | 0.710*  | 0,427    | 0.693*     | 0,488      | 0.692*     | 0.707*  | 0.797**   | 0,339     | 0,485  | 0,385     | 0,487    | 0,358   | 0,526    | 0.664*    | 0,408    | 0,285   | 0.600*    | 0,363  | 0,489     | 0.613*  | 0,502  | -0,369    | -0,325    | 1,000    |       |       |
| DPPH | 0,360  | 0.689*      | 0.776**  | 0,568     | 0.845**     | 0.837** | 0,358    | 0.866***   | 0.691*     | 0.870***   | 0.708*  | 0.899***  | 0,536     | 0,462  | 0,503     | 0,538    | 0.645*  | 0,525    | 0.852***  | 0,340    | 0,370   | 0.671*    | 0,204  | 0.761**   | 0.729** | 0.631* | (-0.646)* | (-0.594)* | 0.861*** | 1,000 |       |
| FRAP | 0,045  | 0,173       | 0.724**  | 0,040     | 0,244       | 0,422   | 0.790**  | 0,219      | 0,351      | 0,479      | 0,374   | 0.619*    | 0,018     | 0,394  | -0,103    | 0.671*   | 0.743** | 0.739**  | 0.645*    | 0.734**  | 0.725** | 0,076     | -0,163 | 0,148     | 0,275   | 0,203  | -0,269    | -0,279    | 0,529    | 0,523 | 1,000 |

Statistically significant correlations: \**p* < 0.05 \*\**p* < 0.01 \*\*\**p* < 0.001

Abbreviations: Numbers 1–28 are phenolic compounds presented in Tables 1 and 2;

ABTS, scavenging capacity of ABTS radical; FRAP, ferric reducing antioxidant power; DPPH, scavenging capacity of DPPH radical

**Table S3.** Contribution of the different phenolic compounds and antioxidant methods to the PCA factors (PC1 and PC2).

| <b>Loadings</b> | <b>PC1</b> | <b>PC2</b> |
|-----------------|------------|------------|
| <b>1</b>        | 0,096      | 0,058      |
| <b>2</b>        | 0,207      | -0,179     |
| <b>3</b>        | 0,220      | 0,131      |
| <b>4</b>        | 0,182      | -0,138     |
| <b>5</b>        | 0,221      | -0,153     |
| <b>7</b>        | 0,201      | 0,033      |
| <b>10</b>       | 0,079      | 0,357      |
| <b>11</b>       | 0,227      | -0,125     |
| <b>12</b>       | 0,219      | -0,106     |
| <b>13</b>       | 0,237      | -0,030     |
| <b>14</b>       | 0,202      | 0,048      |
| <b>15</b>       | 0,215      | 0,062      |
| <b>16</b>       | 0,162      | -0,104     |
| <b>17</b>       | 0,130      | 0,082      |
| <b>18</b>       | 0,153      | -0,250     |
| <b>19</b>       | 0,154      | 0,260      |
| <b>22</b>       | 0,188      | 0,176      |
| <b>23</b>       | 0,121      | 0,316      |
| <b>24</b>       | 0,238      | 0,102      |
| <b>25</b>       | 0,089      | 0,333      |
| <b>26</b>       | 0,099      | 0,333      |
| <b>6</b>        | 0,154      | -0,219     |
| <b>8</b>        | 0,054      | -0,236     |
| <b>9</b>        | 0,213      | -0,059     |
| <b>20</b>       | 0,199      | 0,003      |
| <b>21</b>       | 0,148      | -0,112     |
| <b>27</b>       | -0,191     | 0,158      |
| <b>28</b>       | -0,185     | 0,165      |
| <b>ABTS</b>     | 0,189      | 0,045      |
| <b>DPPH</b>     | 0,235      | 0,015      |
| <b>FRAP</b>     | 0,133      | 0,240      |
